# Supplementary material for: The Influence of Baseline Clinical Status and Surgical Strategy on Early Good to Excellent Result in Spinal Lumbar Arthrodesis: A Machine Learning Approach
Source: MDPI journal article supplement (doi:10.3390/jpm11121377), 2021-12-16
Supplement: s1 [file s1]

**Table S1.** Table 2x2 for Good Clinical Outcome

| Gender |         |              |              |
|--------|---------|--------------|--------------|
|        | Age     | Outcome–     | Outcome+     |
| F      | All     | 255 (19.30%) | 568 (43.00%) |
|        | 20 - 64 | 165 (18.31%) | 380 (42.18%) |
|        | 65 - 74 | 55 (19.10%)  | 130 (45.14%) |
|        | >= 75   | 35 (28.46%)  | 53 (43.09%)  |
| M      | All     | 139 (10.52%) | 359 (27.18%) |
|        | 20 - 64 | 101 (11.21%) | 255 (28.30%) |
|        | 65 - 74 | 31 (10.76%)  | 72 (25.00%)  |
|        | >= 75   | 5 (4.07%)    | 30 (24.39%)  |

| BMI (2) |         |              |              |
|---------|---------|--------------|--------------|
|         | Age     | Outcome–     | Outcome+     |
| < 30    | All     | 343 (26.63%) | 780 (60.56%) |
|         | 20 - 64 | 238 (26.98%) | 550 (62.36%) |
|         | 65 - 74 | 65 (23.47%)  | 157 (56.68%) |
|         | >= 75   | 38 (31.67%)  | 68 (56.67%)  |
| >= 30   | All     | 38 (2.95%)   | 127 (9.86%)  |
|         | 20 - 64 | 23 (2.61%)   | 71 (8.05%)   |
|         | 65 - 74 | 14 (5.05%)   | 41 (14.80%)  |
|         | >= 75   | 1 (0.83%)    | 13 (10.83%)  |

| Charlson Index (1) |         |              |              |
|--------------------|---------|--------------|--------------|
|                    | Age     | Outcome–     | Outcome+     |
| < 5                | All     | 118 (15.07%) | 298 (38.06%) |
|                    | 20 - 64 | 102 (19.14%) | 243 (45.59%) |
|                    | 65 - 74 | 10 (5.85%)   | 38 (22.22%)  |
|                    | >= 75   | 5 (6.76%)    | 13 (15.57%)  |
|                    | Tutti   | 105 (13.41%) | 262 (33.46%) |
| >= 5               | 20 - 64 | 52 (9.76%)   | 136 (25.52%) |
|                    | 65 - 74 | 36 (21.05%)  | 87 (50.88%)  |
|                    | >= 75   | 17 (22.97%)  | 39 (52.70%)  |

| Livels (1) |         |              |              |
|------------|---------|--------------|--------------|
|            | Age     | Outcome–     | Outcome+     |
| < 3        | All     | 142 (18.91%) | 417 (55.53%) |
|            | 20 - 64 | 111 (21.81%) | 291 (57.17%) |
|            | 65 - 74 | 21 (12.96%)  | 79 (48.77%)  |
|            | >= 75   | 10 (13.33%)  | 43 (57.33%)  |
| >= 3       | All     | 77 (10.25%)  | 115 (15.31%) |
|            | 20 - 64 | 38 (7.47%)   | 69 (13.56%)  |
|            | 65 - 74 | 25 (15.43%)  | 37 (22.84%)  |
|            | >= 75   | 13 (17.33%)  | 9 (12.00%)   |

| L5 – S1 |         |              |              |
|---------|---------|--------------|--------------|
|         | Age     | Outcome–     | Outcome+     |
| Other   | All     | 169 (22.44%) | 380 (50.46%) |
|         | 20 - 64 | 102 (20.08%) | 231 (45.47%) |
|         | 65 - 74 | 43 (26.06%)  | 103 (62.42%) |
|         | >= 75   | 23 (30.67%)  | 46 (61.33%)  |
| L5 – S1 | All     | 50 (6.64%)   | 154 (20.45%) |
|         | 20 - 64 | 46 (9.06%)   | 129 (25.39%) |
|         | 65 - 74 | 4 (2.42%)    | 15 (9.09%)   |
|         | >= 75   | 0 (0.00%)    | 6 (8.00%)    |

| L3 – L4 |         |              |              |
|---------|---------|--------------|--------------|
|         | Age     | Outcome–     | Outcome+     |
| Other   | All     | 206 (27.36%) | 497 (66.00%) |
|         | 20 - 64 | 142 (27.95%) | 343 (67.52%) |
|         | 65 - 74 | 43 (26.06%)  | 105 (63.64%) |
|         | >= 75   | 20 (26.67%)  | 45 (60.00%)  |
| L3 – L4 | All     | 13 (1.73%)   | 37 (4.91%)   |

| BMI (1) |         |              |              |
|---------|---------|--------------|--------------|
|         | Age     | Outcome–     | Outcome+     |
| < 25    | All     | 182 (14.13%) | 456 (35.40%) |
|         | 20 - 64 | 137 (15.53%) | 342 (38.78%) |
|         | 65 - 74 | 26 (9.39%)   | 72 (25.99%)  |
|         | >= 75   | 17 (14.17%)  | 37 (30.83%)  |
| >= 25   | All     | 199 (15.45%) | 451 (35.02%) |
|         | 20 - 64 | 124 (14.06%) | 279 (31.63%) |
|         | 65 - 74 | 53 (19.13%)  | 126 (45.49%) |
|         | >= 75   | 22 (18.33%)  | 44 (36.67%)  |

| Revisions |         |              |              |
|-----------|---------|--------------|--------------|
|           | Age     | Outcome–     | Outcome+     |
| No        | All     | 116 (14.78%) | 397 (50.57%) |
|           | 20 - 64 | 80 (14.95%)  | 257 (48.04%) |
|           | 65 - 74 | 23 (13.45%)  | 98 (57.31%)  |
|           | >= 75   | 13 (17.57%)  | 38 (51.35%)  |
| Si        | All     | 108 (13.76%) | 164 (20.89%) |
|           | 20 - 64 | 75 (14.02%)  | 123 (22.99%) |
|           | 65 - 74 | 23 (13.45%)  | 27 (15.79%)  |
|           | >= 75   | 9 (12.16%)   | 14 (18.92%)  |

| Charlson Index (2) |         |              |              |
|--------------------|---------|--------------|--------------|
|                    | Age     | Outcome–     | Outcome+     |
| < 2                | All     | 0 (0.00%)    | 0 (0.00%)    |
|                    | 20 - 64 | 0 (0.00%)    | 0 (0.00%)    |
|                    | 65 - 74 | 0 (0.00%)    | 0 (0.00%)    |
|                    | >= 75   | 0 (0.00%)    | 0 (0.00%)    |
|                    | Tutti   | 223 (28.48%) | 560 (71.52%) |
| >= 2               | 20 - 64 | 154 (28.89%) | 379 (71.11%) |
|                    | 65 - 74 | 46 (26.9%)   | 125 (73.1%)  |
|                    | >= 75   | 22 (29.73%)  | 52 (70.27%)  |

| Livels (2) |         |              |              |
|------------|---------|--------------|--------------|
|            | Age     | Outcome–     | Outcome+     |
| < 2        | All     | 51 (6.79%)   | 180 (23.97%) |
|            | 20 - 64 | 44 (8.64%)   | 137 (26.92%) |
|            | 65 - 74 | 4 (2.47%)    | 26 (16.05%)  |
|            | >= 75   | 3 (4.00%)    | 16 (21.33%)  |
| >= 2       | All     | 168 (22.37%) | 352 (46.87%) |
|            | 20 - 64 | 105 (20.63%) | 223 (43.81%) |
|            | 65 - 74 | 42 (25.93%)  | 90 (55.56%)  |
|            | >= 75   | 20 (26.67%)  | 36 (48.00%)  |

| L4 – L5 |         |              |              |
|---------|---------|--------------|--------------|
|         | Age     | Outcome–     | Outcome+     |
| Other   | All     | 179 (23.77%) | 378 (50.20%) |
|         | 20 - 64 | 118 (23.23%) | 255 (50.20%) |
|         | 65 - 74 | 42 (25.45%)  | 86 (52.12%)  |
|         | >= 75   | 18 (24.00%)  | 33 (44.00%)  |
| L4 – L5 | All     | 40 (5.31%)   | 156 (20.72%) |
|         | 20 - 64 | 30 (5.91%)   | 105 (20.67%) |
|         | 65 - 74 | 5 (3.03%)    | 32 (19.39%)  |
|         | >= 75   | 5 (6.67%)    | 19 (25.33%)  |

| L2 – L3 |         |              |              |
|---------|---------|--------------|--------------|
|         | Age     | Outcome–     | Outcome+     |
| Other   | All     | 217 (28.82%) | 533 (70.78%) |
|         | 20 - 64 | 147 (28.94%) | 360 (70.87%) |
|         | 65 - 74 | 46 (27.88%)  | 117 (70.91%) |
|         | >= 75   | 23 (30.67%)  | 52 (69.33%)  |
| L2 – L3 | All     | 2 (0.27%)    | 1 (0.13%)    |

|  |         |           |            |
|--|---------|-----------|------------|
|  | 20 - 64 | 6 (1.18%) | 17 (3.35%) |
|  | 65 - 74 | 4 (2.42%) | 13 (7.88%) |
|  | >= 75   | 3 (4.00%) | 7 (9.33%)  |

|  |         |           |           |
|--|---------|-----------|-----------|
|  | 20 – 64 | 1 (0.20%) | 0 (0.00%) |
|  | 65 – 74 | 1 (0.61%) | 1 (0.61%) |
|  | >= 75   | 0 (0.00%) | 0 (0.00%) |

| L1 – L2 |         |              |              |
|---------|---------|--------------|--------------|
|         | Age     | Outcome–     | Outcome+     |
| Other   | All     | 218 (28.95%) | 532 (70.65%) |
|         | 20 - 64 | 147 (28.94%) | 359 (70.67%) |
|         | 65 - 74 | 47 (28.48%)  | 117 (70.91%) |
|         | >= 75   | 23 (30.67%)  | 52 (69.33%)  |
| L1 – L2 | All     | 1 (0.13%)    | 2 (0.27%)    |
|         | 20 - 64 | 1 (0.20%)    | 1 (0.20%)    |
|         | 65 - 74 | 0 (0.00%)    | 1 (0.61%)    |
|         | >= 75   | 0 (0.00%)    | 0 (0.00%)    |

| Number of Prevoius Surgeries |         |              |              |
|------------------------------|---------|--------------|--------------|
|                              | Age     | Outcome–     | Outcome+     |
| < 3                          | All     | 203 (25.86%) | 540 (68.79%) |
|                              | 20 - 64 | 138 (25.79%) | 362 (67.66%) |
|                              | 65 - 74 | 42 (24.56%)  | 123 (71.93%) |
|                              | >= 75   | 22 (29.73%)  | 51 (68.92%)  |
| >= 3                         | All     | 21 (2.68%)   | 21 (2.68%)   |
|                              | 20 - 64 | 17 (3.18%)   | 18 (3.36%)   |
|                              | 65 - 74 | 4 (2.34%)    | 2 (1.17%)    |
|                              | >= 75   | 0 (0.00%)    | 1 (1.35%)    |

Gender: Female (F) vs. Male (M); BMI (1): Body Mass Index <25 vs. >= 25; BMI (2): Body Mass Index <30 vs. >= 30; Revision: Surgical revision; Charlson Index (1): < 5 diseases vs. >= 5 diseases; ; Charlson Index (2): < 2 diseases vs. >= 2 diseases; Levels (1): <3 levels of surgery vs. >= 3 levels of surgery; L5-S1: operated vs. no operated; L4-L5: operated vs. no operated; L3-L4: operated vs. no operated; L2-L3: operated vs. no operated; L1-L2: operated vs. no operated; Number of Prevoius Surgeries: <3 previous surgeries vs. >= 3 previous surgeries.

**Table S2.** Odds ratio for Good Clinical Outcome

| Factor | Outcome |   |
|--------|---------|---|
|        | +       | - |
| *      | A       | B |
| **     | C       | D |

$$OR = \frac{A/B}{C/D} = \frac{AD}{BC}$$

|                              | All               | 20 – 64           | 65 – 74           | >= 75              |
|------------------------------|-------------------|-------------------|-------------------|--------------------|
| Gender                       | 0.86 (0.67, 1.10) | 0.91 (0.68, 1.22) | 1.02 (0.60, 1.72) | 0.25 (0.09, 0.71)  |
| BMI (1)                      | 1.11 (0.87, 1.40) | 1.11 (0.83, 1.48) | 1.16 (0.67, 2.02) | 1.09 (0.50, 2.35)  |
| BMI (2)                      | 0.68 (0.46, 1.00) | 0.75 (0.46, 1.23) | 0.82 (0.42, 1.62) | 0.14 (0.02, 1.09)  |
| Revisions                    | 2.25 (1.64, 3.10) | 1.96 (1.34, 2.87) | 3.63 (1.77, 7.44) | 1.88 (0.66, 5.36)  |
| Charlson (1)                 | 1.01 (0.74, 1.38) | 0.91 (0.61, 1.35) | 1.57 (0.71, 3.49) | 1.13 (0.35, 3.68)  |
| Charlson (2)                 | -                 | -                 | -                 | -                  |
| Livels (1)                   | 1.97 (1.39, 2.78) | 1.44 (0.92, 2.27) | 2.54 (1.26, 5.12) | 6.21 (2.08, 18.54) |
| Livels (2)                   | 1.68 (1.17, 2.42) | 1.47 (0.97, 2.21) | 3.03 (1.00, 9.25) | 2.96 (0.77, 11.42) |
| L5-S1                        | 0.73 (0.51, 1.05) | 0.81 (0.54, 1.22) | 0.64 (0.20, 2.04) | -                  |
| L4-L5                        | 0.54 (0.37, 0.80) | 0.62 (0.39, 0.98) | 0.32 (0.12, 0.88) | 0.48 (0.15, 1.51)  |
| L3-L4                        | 0.85 (0.44, 1.63) | 0.85 (0.33, 2.21) | 0.75 (0.23, 2.43) | -                  |
| L2-L3                        | -                 | -                 | -                 | -                  |
| L1-L2                        | -                 | -                 | -                 | -                  |
| Number of Previous Surgeries | 2.66 (1.42, 4.97) | 2.48 (1.24, 4.95) | -                 | -                  |

OR (CI); Gender: Female (F) vs. Male (M); BMI (1): Body Mass Index <25 vs. >= 25; BMI (2): Body Mass Index <30 vs. >= 30; Revision: Surgical revision; Charlson Index (1): < 5 diseases vs. >= 5 diseases; ; Charlson Index (2): < 2 diseases vs. >= 2 diseases; Levels (1): <3 levels of surgery vs. >= 3 levels of surgery; L5-S1: operated vs. no operated; L4-L5: operated vs. no operated; L3-L4: operated vs. no operated; L2-L3: operated vs. no operated; L1-L2: operated vs. no operated; Number of Previous Surgeries: <3 previous surgeries vs. >= 3 previous surgeries.

Table S3. Chi-square test for Good Clinical Outcome

**Overall**

|            | Gender    | BMI (1)   | BMI (2)    | Revisions    | Charlson Index (1) | Charlson Index (2) | Livels (1)   |
|------------|-----------|-----------|------------|--------------|--------------------|--------------------|--------------|
| p-value    | 0.2623157 | 0.4471738 | 0.05969474 | 6.916487e-07 | 1                  | -                  | 0.0001600744 |
| conclusion | No diff   | No diff   | No diff    | Diff         | No diff            | -                  | Diff         |

  

|            | Livels (2)  | L5-S1     | L4-L5       | L3-L4     | L2-L3 | L1-L2 | Number of Previous Surgeries |
|------------|-------------|-----------|-------------|-----------|-------|-------|------------------------------|
| p-value    | 0.005788207 | 0.1108504 | 0.002543689 | 0.7370483 | -     | -     | 0.002782985                  |
| conclusion | Diff        | No diff   | Diff        | No diff   | -     | -     | Diff                         |

**Age: 20 - 64**

|            | Gender    | BMI (1)  | BMI (2)  | Revisions    | Charlson Index (1) | Charlson Index (2) | Livels (1) |
|------------|-----------|----------|----------|--------------|--------------------|--------------------|------------|
| p-value    | 0.5905967 | 0.529602 | 0.302134 | 0.0007186022 | 0.7160197          | -                  | 0.1396932  |
| conclusion | No diff   | No diff  | No diff  | Diff         | No diff            | -                  | No diff    |

  

|            | Livels (2) | L5-S1    | L4-L5      | L3-L4     | L2-L3 | L1-L2 | Number of Previous Surgeries |
|------------|------------|----------|------------|-----------|-------|-------|------------------------------|
| p-value    | 0.08425418 | 0.356826 | 0.05093399 | 0.9248703 | -     | -     | 0.0142337                    |
| conclusion | No diff    | No diff  | No diff    | No diff   | -     | -     | Diff                         |

**Age: 65 - 74**

|            | Gender  | BMI (1)   | BMI (2)   | Revisions    | Charlson Index (1) | Charlson Index (2) | Livels (1) |
|------------|---------|-----------|-----------|--------------|--------------------|--------------------|------------|
| p-value    | 1       | 0.6866514 | 0.6923901 | 0.0006014239 | 0.3545524          | -                  | 0.01344484 |
| conclusion | No diff | No diff   | No diff   | Diff         | No diff            | -                  | Diff       |

  

|            | Livels (2) | L5-S1     | L4-L5      | L3-L4     | L2-L3 | L1-L2 | Number of Previous Surgeries |
|------------|------------|-----------|------------|-----------|-------|-------|------------------------------|
| p-value    | 0.07146174 | 0.6221021 | 0.03715548 | 0.8459507 | -     | -     | -                            |
| conclusion | No diff    | No diff   | Diff       | No diff   | -     | -     | -                            |

**Age: >= 75**

|            | Gender     | BMI (1)   | BMI (2)    | Revisions | Charlson Index (1) | Charlson Index (2) | Livels (1)  |
|------------|------------|-----------|------------|-----------|--------------------|--------------------|-------------|
| p-value    | 0.01209824 | 0.9843717 | 0.06406321 | 0.3610345 | 1                  | -                  | 0.001553829 |
| conclusion | Diff       | No diff   | No diff    | No diff   | No diff            | -                  | Diff        |

  

|            | Livels (2) | L5-S1 | L4-L5     | L3-L4 | L2-L3 | L1-L2 | Number of Previous Surgeries |
|------------|------------|-------|-----------|-------|-------|-------|------------------------------|
| p-value    | 0.1803609  | -     | 0.3180364 | -     | -     | -     | -                            |
| conclusion | No diff    | -     | No diff   | -     | -     | -     | -                            |

$H_0: \pi_1 = \pi_2$  There is no difference between the proportions (No diff);  $H_1: \pi_1 \neq \pi_2$  Significant difference in proportions (Diff); Note: significance of 5%. Gender: Female (F) vs. Male (M); BMI (1): Body Mass Index <25 vs.  $\geq 25$ ; BMI (2): Body Mass Index <30 vs.  $\geq 30$ ; Revision: Surgical revision; Charlson Index (1): < 5 diseases vs.  $\geq 5$  diseases; ; Charlson Index (2): < 2 diseases vs.  $\geq 2$  diseases; Levels (1): <3 levels of surgery vs.  $\geq 3$  levels of surgery; L5-S1: operated vs. no operated; L4-L5: operated vs. no operated; L3-L4: operated vs. no operated; L2-L3: operated vs. no operated; L1-L2: operated vs. no operated; Number of Prevoius Surgeries: <3 previous surgeries vs.  $\geq 3$  previous surgeries.

**Table S4.** Summary table of the chi-square test for Good Clinical Outcome

|         | Gender | BMI (1) | BMI (2) | Revisions | Charlson Index (1) | Charlson Index (2) | Livels (1) | Livels (2) | L5-S1 | L4-L5 | L3-L4 | L2-L3 | L1-L2 | Number of Previous Surgeries |
|---------|--------|---------|---------|-----------|--------------------|--------------------|------------|------------|-------|-------|-------|-------|-------|------------------------------|
| All     | No     | No      | No      | Diff      | No                 | -                  | Diff       | Diff       | No    | Diff  | No    | -     | -     | Diff                         |
| 20 – 64 | No     | No      | No      | Diff      | No                 | -                  | No         | No         | No    | No    | No    | -     | -     | Diff                         |
| 65 – 74 | No     | No      | No      | Diff      | No                 | -                  | Diff       | No         | No    | Diff  | No    | -     | -     | -                            |
| >= 75   | Diff   | No      | No      | No        | No                 | -                  | Dif        | No         | -     | No    | -     | -     | -     | -                            |

No: no significant difference / Diff: significant difference / -: presence of zero or almost zero frequencies. Gender: Female (F) vs. Male (M); BMI (1): Body Mass Index <25 vs. >= 25; BMI (2): Body Mass Index <30 vs. >= 30; Revision: Surgical revision; Charlson Index (1): < 5 diseases vs. >= 5 diseases; ; Charlson Index (2): < 2 diseases vs. >= 2 diseases; Levels (1): <3 levels of surgery vs. >= 3 levels of surgery; L5-S1: operated vs. no operated; L4-L5: operated vs. no operated; L3-L4: operated vs. no operated; L2-L3: operated vs. no operated; L1-L2: operated vs. no operated; Number of Prevoius Surgeries: <3 previous surgeries vs. >= 3 previous surgeries.

**Table S5.** Table 2x2 for Excellent Clinical Outcome

| Gender |         |              |              |
|--------|---------|--------------|--------------|
|        | Age     | Outcome–     | Outcome+     |
| F      | All     | 433 (34.98%) | 338 (27.30%) |
|        | 20 - 64 | 279 (33.37%) | 223 (26.67%) |
|        | 65 - 74 | 99 (36.13%)  | 79 (28.83%)  |
|        | >= 75   | 55 (46.22%)  | 31 (26.05%)  |
| M      | All     | 246 (19.87%) | 221 (17.85%) |
|        | 20 - 64 | 178 (21.29%) | 156 (18.66%) |
|        | 65 - 74 | 46 (16.79%)  | 50 (18.25%)  |
|        | >= 75   | 18 (15.13%)  | 15 (12.61%)  |

| BMI (2) |         |              |              |
|---------|---------|--------------|--------------|
|         | Age     | Outcome–     | Outcome+     |
| < 30    | All     | 583 (48.34%) | 468 (38.81%) |
|         | 20 - 64 | 407 (49.76%) | 327 (39.98%) |
|         | 65 - 74 | 106 (40.30%) | 102 (38.78%) |
|         | >= 75   | 66 (56.90%)  | 36 (31.03%)  |
| >= 30   | All     | 77 (6.38%)   | 78 (6.47%)   |
|         | 20 - 64 | 42 (5.13%)   | 42 (5.13%)   |
|         | 65 - 74 | 30 (11.41%)  | 25 (9.51%)   |
|         | >= 75   | 5 (4.31%)    | 9 (7.76%)    |

| Charlson (1) |         |              |              |
|--------------|---------|--------------|--------------|
|              | Age     | Outcome–     | Outcome+     |
| < 5          | All     | 208 (28.38%) | 177 (24.15%) |
|              | 20 - 64 | 176 (35.63%) | 141 (28.54%) |
|              | 65 - 74 | 20 (12.35%)  | 25 (15.43%)  |
|              | >= 75   | 10 (13.89%)  | 8 (11.11%)   |
|              |         |              |              |
| >= 5         | All     | 183 (24.97%) | 165 (22.51%) |
|              | 20 - 64 | 89 (18.02%)  | 88 (17.81%)  |
|              | 65 - 74 | 59 (36.42%)  | 58 (35.80%)  |
|              | >= 75   | 35 (48.61%)  | 19 (26.39%)  |
|              |         |              |              |

| Livelli (1) |         |              |              |
|-------------|---------|--------------|--------------|
|             | Age     | Outcome–     | Outcome+     |
| < 3         | All     | 254 (36.03%) | 271 (38.44%) |
|             | 20 - 64 | 189 (39.87%) | 186 (39.24%) |
|             | 65 - 74 | 36 (23.53%)  | 58 (37.91%)  |
|             | >= 75   | 28 (38.36%)  | 24 (32.88%)  |
|             |         |              |              |
| >= 3        | All     | 126 (17.87%) | 54 (7.66%)   |
|             | 20 - 64 | 67 (14.14%)  | 32 (6.75%)   |
|             | 65 - 74 | 40 (26.14%)  | 19 (12.42%)  |
|             | >= 75   | 18 (24.66%)  | 3 (4.11%)    |
|             |         |              |              |

| L5 – S1 |         |              |              |
|---------|---------|--------------|--------------|
|         | Age     | Outcome–     | Outcome+     |
| Other   | All     | 284 (40.23%) | 227 (32.15%) |
|         | 20 - 64 | 170 (36.02%) | 135 (28.60%) |
|         | 65 - 74 | 69 (44.23%)  | 69 (44.23%)  |
|         | >= 75   | 44 (60.27%)  | 23 (31.51%)  |
|         |         |              |              |
| L5 – S1 | All     | 95 (13.46%)  | 100 (14.16%) |
|         | 20 - 64 | 84 (17.80%)  | 83 (17.58%)  |
|         | 65 - 74 | 8 (5.13%)    | 10 (6.41%)   |
|         | >= 75   | 2 (2.74%)    | 4 (5.48%)    |
|         |         |              |              |

| L3 – L4 |         |              |              |
|---------|---------|--------------|--------------|
|         | Age     | Outcome–     | Outcome+     |
| Other   | All     | 359 (50.85%) | 301 (42.63%) |
|         | 20 - 64 | 245 (51.91%) | 207 (43.86%) |
|         | 65 - 74 | 71 (45.51%)  | 69 (44.23%)  |
|         | >= 75   | 41 (56.16%)  | 22 (30.14%)  |
|         |         |              |              |
| L3 – L4 | All     | 20 (2.83%)   | 26 (3.68%)   |

| BMI (1) |         |              |              |
|---------|---------|--------------|--------------|
|         | Age     | Outcome–     | Outcome+     |
| < 25    | All     | 327 (27.11%) | 264 (21.89%) |
|         | 20 - 64 | 247 (30.20%) | 195 (23.84%) |
|         | 65 - 74 | 48 (18.25%)  | 44 (16.73%)  |
|         | >= 75   | 28 (24.14%)  | 22 (18.97%)  |
| >= 25   | All     | 333 (27.61%) | 282 (23.38%) |
|         | 20 - 64 | 202 (24.69%) | 174 (21.27%) |
|         | 65 - 74 | 88 (33.46%)  | 83 (31.56%)  |
|         | >= 75   | 43 (37.07%)  | 23 (19.83%)  |

| Revisions |         |              |              |
|-----------|---------|--------------|--------------|
|           | Age     | Outcome–     | Outcome+     |
| No        | All     | 229 (31.16%) | 254 (34.56%) |
|           | 20 - 64 | 156 (31.45%) | 159 (32.06%) |
|           | 65 - 74 | 44 (27.16%)  | 71 (43.83%)  |
|           | >= 75   | 28 (38.89%)  | 21 (29.17%)  |
| Yes       | All     | 163 (22.18%) | 89 (12.11%)  |
|           | 20 - 64 | 110 (22.18%) | 71 (14.31%)  |
|           | 65 - 74 | 35 (21.60%)  | 12 (7.41%)   |
|           | >= 75   | 17 (23.61%)  | 6 (8.33%)    |

| Charlson (2) |         |              |              |
|--------------|---------|--------------|--------------|
|              | Age     | Outcome–     | Outcome+     |
| < 2          | All     | 0 (0.00%)    | 0 (0.00%)    |
|              | 20 - 64 | 0 (0.00%)    | 0 (0.00%)    |
|              | 65 - 74 | 0 (0.00%)    | 0 (0.00%)    |
|              | >= 75   | 0 (0.00%)    | 0 (0.00%)    |
|              |         |              |              |
| >= 2         | All     | 391 (53.34%) | 342 (46.66%) |
|              | 20 - 64 | 265 (53.64%) | 229 (46.36%) |
|              | 65 - 74 | 79 (48.77%)  | 83 (51.23%)  |
|              | >= 75   | 45 (62.5%)   | 27 (37.5%)   |
|              |         |              |              |

| Livelli (2) |         |              |              |
|-------------|---------|--------------|--------------|
|             | Age     | Outcome–     | Outcome+     |
| < 2         | All     | 97 (13.76%)  | 121 (17.16%) |
|             | 20 - 64 | 80 (16.88%)  | 90 (18.99%)  |
|             | 65 - 74 | 7 (4.58%)    | 21 (13.73%)  |
|             | >= 75   | 10 (13.70%)  | 9 (12.33%)   |
|             |         |              |              |
| >= 2        | All     | 283 (40.14%) | 204 (28.94%) |
|             | 20 - 64 | 176 (37.13%) | 128 (27.00%) |
|             | 65 - 74 | 69 (45.10%)  | 56 (36.60%)  |
|             | >= 75   | 36 (49.32%)  | 18 (24.66%)  |
|             |         |              |              |

| L4 – L5 |         |              |              |
|---------|---------|--------------|--------------|
|         | Age     | Outcome–     | Outcome+     |
| Other   | All     | 304 (43.06%) | 220 (31.16%) |
|         | 20 - 64 | 202 (42.80%) | 146 (30.93%) |
|         | 65 - 74 | 69 (44.23%)  | 53 (33.97%)  |
|         | >= 75   | 31 (42.47%)  | 18 (24.66%)  |
|         |         |              |              |
| L4 – L5 | All     | 75 (10.62%)  | 107 (15.16%) |
|         | 20 - 64 | 52 (11.02%)  | 72 (15.25%)  |
|         | 65 - 74 | 8 (5.13%)    | 26 (16.67%)  |
|         | >= 75   | 15 (20.55%)  | 9 (12.33%)   |
|         |         |              |              |

| L2 – L3 |         |              |              |
|---------|---------|--------------|--------------|
|         | Age     | Outcome–     | Outcome+     |
| Other   | All     | 377 (53.40%) | 326 (46.18%) |
|         | 20 - 64 | 253 (53.60%) | 218 (46.19%) |
|         | 65 - 74 | 76 (48.72%)  | 78 (50.00%)  |
|         | >= 75   | 46 (63.01%)  | 27 (36.99%)  |
|         |         |              |              |
| L2 – L3 | All     | 2 (0.28%)    | 1 (0.14%)    |



|  |         |           |            |
|--|---------|-----------|------------|
|  | 20 - 64 | 9 (1.91%) | 11 (2.33%) |
|  | 65 - 74 | 6 (3.85%) | 10 (6.41%) |
|  | >= 75   | 5 (6.85%) | 5 (6.85%)  |

|  |         |           |           |
|--|---------|-----------|-----------|
|  | 20 – 64 | 1 (0.21%) | 0 (0.00%) |
|  | 65 – 74 | 1 (0.64%) | 1 (0.64%) |
|  | >= 75   | 0 (0.00%) | 0 (0.00%) |

| L1 – L2 |         |              |              |
|---------|---------|--------------|--------------|
|         | Age     | Outcome–     | Outcome+     |
| Other   | All     | 376 (53.26%) | 327 (46.32%) |
|         | 20 - 64 | 252 (53.39%) | 218 (46.19%) |
|         | 65 - 74 | 76 (48.72%)  | 79 (50.64%)  |
|         | >= 75   | 46 (63.01%)  | 27 (36.99%)  |
| L1 – L2 | All     | 3 (0.42%)    | 0 (0.00%)    |
|         | 20 - 64 | 2 (0.42%)    | 0 (0.00%)    |
|         | 65 - 74 | 1 (0.64%)    | 0 (0.00%)    |
|         | >= 75   | 0 (0.00%)    | 0 (0.00%)    |

| Number of Previous Surgeries |         |              |              |
|------------------------------|---------|--------------|--------------|
|                              | Age     | Outcome–     | Outcome+     |
| < 3                          | All     | 360 (48.98%) | 336 (45.71%) |
|                              | 20 - 64 | 240 (48.39%) | 223 (44.96%) |
|                              | 65 - 74 | 74 (45.68%)  | 83 (51.23%)  |
|                              | >= 75   | 44 (61.11%)  | 27 (37.50%)  |
| >= 3                         | All     | 32 (4.35%)   | 7 (0.95%)    |
|                              | 20 - 64 | 26 (5.24%)   | 7 (1.41%)    |
|                              | 65 - 74 | 5 (3.09%)    | 0 (0.00%)    |
|                              | >= 75   | 1 (1.39%)    | 0 (0.00%)    |

Gender: Female (F) vs. Male (M); BMI (1): Body Mass Index <25 vs. >= 25; BMI (2): Body Mass Index <30 vs. >= 30; Revision: Surgical revision; Charlson Index (1): < 5 diseases vs. >= 5 diseases; ; Charlson Index (2): < 2 diseases vs. >= 2 diseases; Levels (1): <3 levels of surgery vs. >= 3 levels of surgery; L5-S1: operated vs. no operated; L4-L5: operated vs. no operated; L3-L4: operated vs. no operated; L2-L3: operated vs. no operated; L1-L2: operated vs. no operated; Number of Previous Surgeries: <3 previous surgeries vs. >= 3 previous surgeries.

**Table S6.** Odds ratio for Excellent Clinical Outcome

| Factor | Outcome |   |
|--------|---------|---|
|        | +       | - |
| *      | A       | B |
| **     | C       | D |

$$OR = \frac{A/B}{C/D} = \frac{AD}{BC}$$

|                              | All               | 20 – 64           | 65 – 74            | >= 75              |
|------------------------------|-------------------|-------------------|--------------------|--------------------|
| Gender                       | 0.87 (0.69, 1.09) | 0.91 (0.69, 1.20) | 0.73 (0.45, 1.21)  | 0.68 (0.30, 1.53)  |
| BMI (1)                      | 0.95 (0.76, 1.20) | 0.92 (0.70, 1.21) | 0.97 (0.59, 1.61)  | 1.47 (0.69, 3.12)  |
| BMI (2)                      | 0.79 (0.57, 1.11) | 0.80 (0.51, 1.26) | 1.15 (0.64, 2.10)  | 0.30 (0.09, 0.97)  |
| Revisions                    | 2.03 (1.48, 2.78) | 1.58 (1.09, 2.29) | 4.71 (2.21, 10.02) | 2.12 (0.72, 6.32)  |
| Charlson (1)                 | 0.94 (0.71, 1.26) | 0.81 (0.56, 1.17) | 1.27 (0.64, 2.54)  | 1.47 (0.50, 4.36)  |
| Charlson (2)                 | -                 | -                 | -                  | -                  |
| Livels (1)                   | 2.49 (1.73, 3.57) | 2.06 (1.29, 3.29) | 3.39 (1.71, 6.74)  | 5.14 (1.35, 19.61) |
| Livels (2)                   | 1.73 (1.25, 2.39) | 1.55 (1.06, 2.26) | 3.70 (1.47, 9.32)  | 1.80 (0.62, 5.21)  |
| L5-S1                        | 0.76 (0.55, 1.06) | 0.80 (0.55, 1.17) | 0.80 (0.30, 2.15)  | 0.26 (0.04, 1.54)  |
| L4-L5                        | 0.51 (0.36, 0.71) | 0.52 (0.34, 0.79) | 0.24 (0.10, 0.56)  | 0.97 (0.35, 2.66)  |
| L3-L4                        | 0.64 (0.35, 1.18) | 0.69 (0.28, 1.70) | 0.58 (0.20, 1.69)  | 0.54 (0.14, 2.06)  |
| L2-L3                        | -                 | -                 | -                  | -                  |
| L1-L2                        | -                 | -                 | -                  | -                  |
| Number of Previous Surgeries | 4.27 (1.86, 9.80) | 3.45 (1.47, 8.11) | -                  | -                  |

OR (CI)

OR: (CI); Gender: Female (F) vs. Male (M); BMI (1): Body Mass Index <25 vs. >= 25; BMI (2): Body Mass Index <30 vs. >= 30; Revision: Surgical revision; Charlson Index (1): < 5 diseases vs. >= 5 diseases; ; Charlson Index (2): < 2 diseases vs. >= 2 diseases; Levels (1): <3 levels of surgery vs. >= 3 levels of surgery; L5-S1: operated vs. no operated; L4-L5: operated vs. no operated; L3-L4: operated vs. no operated; L2-L3: operated vs. no operated; L1-L2: operated vs. no operated; Number of Previous Surgeries: <3 previous surgeries vs. >= 3 previous surgeries.

Table S7. Chi-square test for Excellent Clinical Outcome

## Overall

|            | Gender    | BMI (1)   | BMI (2)   | Revisions    | Charlson Index (1) | Charlson Index (2) | Livels (1)   |
|------------|-----------|-----------|-----------|--------------|--------------------|--------------------|--------------|
| p-value    | 0.2563394 | 0.7226324 | 0.2053972 | 1.203415e-05 | 0.7519674          | -                  | 8.030184e-07 |
| conclusion | No diff   | No diff   | No diff   | Diff         | No diff            | -                  | Diff         |

  

|            | Livels (2)  | L5-S1     | L4-L5            | L3-L4     | L2-L3 | L1-L2 | Number of Previous Surgeries |
|------------|-------------|-----------|------------------|-----------|-------|-------|------------------------------|
| p-value    | 0.001074997 | 0.1211771 | 0.000127610<br>1 | 0.1996269 | -     | -     | 0.0004166708                 |
| conclusion | Diff        | No diff   | Diff             | No diff   | -     | -     | Diff                         |

## Age: 20 - 64

|            | Gender    | BMI (1)   | BMI (2)   | Revisions  | Charlson Index (1) | Charlson Index (2) | Livels (1)  |
|------------|-----------|-----------|-----------|------------|--------------------|--------------------|-------------|
| p-value    | 0.5626514 | 0.5837394 | 0.4036794 | 0.02006563 | 0.3051875          | -                  | 0.003131671 |
| conclusion | No diff   | No diff   | No diff   | Diff       | No diff            | -                  | Diff        |

  

|            | Livels (2) | L5-S1     | L4-L5       | L3-L4     | L2-L3 | L1-L2 | Number of Previous Surgeries |
|------------|------------|-----------|-------------|-----------|-------|-------|------------------------------|
| p-value    | 0.02969463 | 0.2999077 | 0.002836307 | 0.5627606 | -     | -     | 0.004816911                  |
| conclusion | Diff       | No diff   | Diff        | No diff   | -     | -     | Diff                         |

## Age: 65 - 74

|            | Gender    | BMI (1) | BMI (2)   | Revisions   | Charlson Index (1) | Charlson Index (2) | Livels (1)   |
|------------|-----------|---------|-----------|-------------|--------------------|--------------------|--------------|
| p-value    | 0.2750078 | 1       | 0.7479786 | 6.04923e-05 | 0.6122256          | -                  | 0.0007091525 |
| conclusion | No diff   | No diff | No diff   | Diff        | No diff            | -                  | Diff         |

  

|            | Livels (2)  | L5-S1     | L4-L5       | L3-L4     | L2-L3 | L1-L2 | Number of Previous Surgeries |
|------------|-------------|-----------|-------------|-----------|-------|-------|------------------------------|
| p-value    | 0.007365971 | 0.8471254 | 0.001315736 | 0.4607421 | -     | -     | -                            |
| conclusion | Diff        | No diff   | Diff        | No diff   | -     | -     | -                            |

## Age: &gt;= 75

|            | Gender    | BMI (1)   | BMI (2)    | Revisions | Charlson Index (1) | Charlson Index (2) | Livels (1) |
|------------|-----------|-----------|------------|-----------|--------------------|--------------------|------------|
| p-value    | 0.4634132 | 0.4183245 | 0.07264382 | 0.2672363 | 0.67329            | -                  | 0.02229397 |
| conclusion | No diff   | No diff   | No diff    | No diff   | No diff            | -                  | Diff       |

|            | Livels (2) | L5-S1 | L4-L5   | L3-L4 | L2-L3 | L1-L2 | Number of Previous Surgeries |
|------------|------------|-------|---------|-------|-------|-------|------------------------------|
| p-value    | 0.4158479  | -     | 1       | -     | -     | -     | -                            |
| conclusion | No diff    | -     | No diff | -     | -     | -     | -                            |

$H_0: \pi_1 = \pi_2$  There is no difference between the proportions (No diff);  $H_1: \pi_1 \neq \pi_2$  Significant difference in proportions (Diff); Note: significance of 5%. Gender: Female (F) vs. Male (M); BMI (1): Body Mass Index <25 vs.  $\geq 25$ ; BMI (2): Body Mass Index <30 vs.  $\geq 30$ ; Revision: Surgical revision; Charlson Index (1): < 5 diseases vs.  $\geq 5$  diseases; ; Charlson Index (2): < 2 diseases vs.  $\geq 2$  diseases; Levels (1): <3 levels of surgery vs.  $\geq 3$  levels of surgery; L5-S1: operated vs. no operated; L4-L5: operated vs. no operated; L3-L4: operated vs. no operated; L2-L3: operated vs. no operated; L1-L2: operated vs. no operated; Number of Prevoius Surgeries: <3 previous surgeries vs.  $\geq 3$  previous surgeries.

**Table S8.** Summary table of the chi-square test for Excellent Clinical Outcome

|         | Gender | BMI (1) | BMI (2) | Revisions | Charlson Index (1) | Charlson Index (2) | Livels (1) | Livels (2) | L5-S1 | L4-L5 | L3-L4 | L2-L3 | L1-L2 | Number of Previous Surgeries |
|---------|--------|---------|---------|-----------|--------------------|--------------------|------------|------------|-------|-------|-------|-------|-------|------------------------------|
| Tutti   | No     | No      | No      | Diff      | No                 | -                  | Diff       | Diff       | No    | Diff  | No    | -     | -     | Dif                          |
| 20 – 64 | No     | No      | No      | Diff      | No                 | -                  | Diff       | Diff       | No    | Diff  | No    | -     | -     | Dif                          |
| 65 – 74 | No     | No      | No      | Diff      | No                 | -                  | Diff       | Diff       | No    | Diff  | No    | -     | -     | -                            |
| >= 75   | No     | No      | No      | No        | No                 | -                  | Diff       | No         | -     | No    | -     | -     | -     | -                            |

No: no significant difference / Diff: significant difference / -: presence of zero or almost zero frequencies. Gender: Female (F) vs. Male (M); BMI (1): Body Mass Index <25 vs. >= 25; BMI (2): Body Mass Index <30 vs. >= 30; Revision: Surgical revision; Charlson Index (1): < 5 diseases vs. >= 5 diseases; ; Charlson Index (2): < 2 diseases vs. >= 2 diseases; Levels (1): <3 levels of surgery vs. >= 3 levels of surgery; L5-S1: operated vs. no operated; L4-L5: operated vs. no operated; L3-L4: operated vs. no operated; L2-L3: operated vs. no operated; L1-L2: operated vs. no operated; Number of Previous Surgeries: <3 previous surgeries vs. >= 3 previous surgeries.

**Table S9.** Paired t-test for Good Clinical Outcome

|         |            | ODI           | COMI          | SF36 P        | SF36 M       |
|---------|------------|---------------|---------------|---------------|--------------|
| All     | p-value    | 4.982479e-248 | 9.081321e-313 | 1.096454e-152 | 5.228172e-38 |
|         | conclusion | Diff          | Diff          | Diff          | Diff         |
| 20 – 64 | p-value    | 7.038763e-170 | 4.931774e-210 | 2.07989e-99   | 3.502438e-22 |
|         | conclusion | Diff          | Diff          | Diff          | Diff         |
| 65 – 74 | p-value    | 1.10763e-59   | 1.279598e-72  | 2.761798e-41  | 9.231984e-17 |
|         | conclusion | Diff          | Diff          | Diff          | Diff         |
| >= 75   | p-value    | 1.305395e-20  | 1.983991e-30  | 1.379067e-14  | 0.001794689  |
|         | conclusion | Diff          | Diff          | Diff          | Diff         |

H0: There is no difference between the averages of the two paired samples (pre and post operation) (No diff); H1: Significant difference between the means of the two samples (pre and post operation) (Diff); Note: significance of 5%. ODI: Oswestry disability index; COMI: pre-operative core outcome measures index; SF36 P: pre-operative physical component score of the short form-36; SF36 M: pre-operative men-tal component score of the short form-36.

**Table S10.** Paired t-test for Excellent Clinical Outcome

|         |            | ODI           | COMI          | SF36 P        | SF36 M       |
|---------|------------|---------------|---------------|---------------|--------------|
| All     | p-value    | 2.491239e-248 | 4.54066e-313  | 5.482269e-153 | 2.614086e-38 |
|         | conclusion | Pre > Post    | Pre > Post    | Pre < Post    | Pre < Post   |
| 20 – 64 | p-value    | 3.519381e-170 | 2.465887e-210 | 1.039945e-99  | 1.751219e-22 |
|         | conclusion | Pre > Post    | Pre > Post    | Pre < Post    | Pre < Post   |
| 65 – 74 | p-value    | 5.538152e-60  | 6.397991e-73  | 1.380899e-41  | 4.615992e-17 |
|         | conclusion | Pre > Post    | Pre > Post    | Pre < Post    | Pre < Post   |
| >= 75   | p-value    | 6.526976e-21  | 9.919954e-31  | 6.895335e-15  | 0.0008973446 |
|         | conclusion | Pre > Post    | Pre > Post    | Pre < Post    | Pre < Post   |

H0: There is no difference between the averages of the two paired samples (pre and post operation); H1: Pre operation > Post operation (ODI, COMI), Pre operation < Post operation (SF36 P / M); Note: significance of 5%. ODI: Oswestry disability index; COMI: pre-operative core outcome measures index; SF36 P: pre-operative physical component score of the short form-36; SF36 M: pre-operative men-tal component score of the short form-36.

**Table S11.** Wilcoxon test for Good and Excellent Clinical Outcome

|         |            | ODI           | COMI          | SF36 P        | SF36 M       |
|---------|------------|---------------|---------------|---------------|--------------|
| All     | p-value    | 1.271228e-180 | 1.847914e-190 | 3.257621e-126 | 7.759346e-36 |
|         | conclusion | Diff          | Diff          | Diff          | Diff         |
| 20 – 64 | p-value    | 9.914093e-126 | 7.047989e-129 | 2.206261e-82  | 4.243412e-20 |
|         | conclusion | Diff          | Diff          | Diff          | Diff         |
| 65 – 74 | p-value    | 2.526231e-41  | 1.88675e-44   | 9.822779e-34  | 4.618583e-17 |
|         | conclusion | Diff          | Diff          | Diff          | Diff         |
| >= 75   | p-value    | 2.728287e-16  | 1.958907e-19  | 4.893749e-13  | 0.002570207  |
|         | conclusion | Diff          | Diff          | Diff          | Diff         |
|         |            | ODI           | COMI          | SF36 P        | SF36 M       |

|         |            |               |               |              |              |
|---------|------------|---------------|---------------|--------------|--------------|
| All     | p-value    | 6.356139e-181 | 9.23957e-191  | 1.62881e-126 | 3.879673e-36 |
|         | conclusion | Pre > Post    | Pre > Post    | Pre < Post   | Pre < Post   |
| 20 – 64 | p-value    | 4.957046e-126 | 3.523994e-129 | 1.10313e-82  | 2.121706e-20 |
|         | conclusion | Pre > Post    | Pre > Post    | Pre < Post   | Pre < Post   |
| 65 – 74 | p-value    | 1.263115e-41  | 9.43375e-45   | 4.911389e-34 | 2.309292e-17 |
|         | conclusion | Pre > Post    | Pre > Post    | Pre < Post   | Pre < Post   |
| >= 75   | p-value    | 1.364144e-16  | 9.794533e-20  | 2.446875e-13 | 0.001285104  |
|         | conclusion | Pre > Post    | Pre > Post    | Pre < Post   | Pre < Post   |

Non-parametric equivalent of the paired t-test generally applied for data not satisfying normality. In this case it is applied to all data anyway. The differences in all pre- and post-operation scores are significant for all age scenarios. In ODI and COMI the pre-operation scores are significantly higher than the post-operation scores for all age scenarios, vice versa for SF36 PCS / MCS. ODI: Oswestry disability index; COMI: pre-operative core outcome measures index; SF36 P: pre-operative physical component score of the short form-36; SF36 M: pre-operative mental component score of the short form-36.



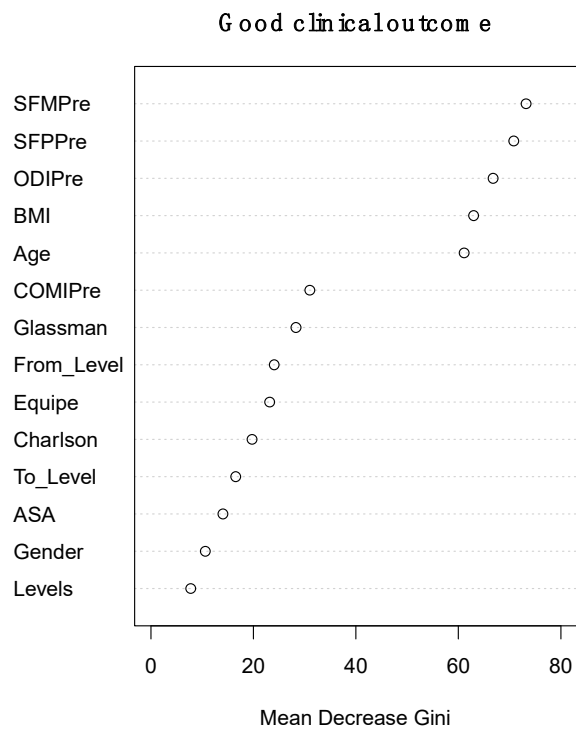

**Figure S1.** Mean Decrease Gini for Good Clinical Outcome. Glassman: Glassman classification data; Equipe: surgical team; BMI: body mass index; ODIPPre: pre-operative; Oswestry disability index; COMIPPre: pre-operative core outcome measures index; SFPPPre: pre-operative physical component score of the short form-36; SFMPPre: pre-operative men-tal component score of the short form-36; CCI: Charlson comorbidity index. From\_level: Upper instrumented vertebra; To\_level: lower level of instrumented vertebra. ASA: American Society of Anesthesiologists Score.

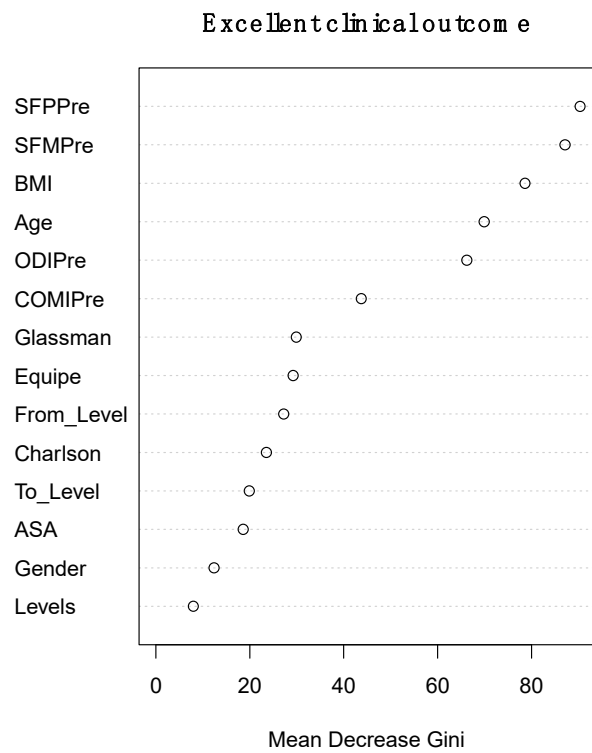

**Figure S2.** Mean Decrease Gini for Excellent Clinical Outcome. Glassman: Glassman classification data; Equipe: surgical team; BMI: body mass index; ODIPre: pre-operative; Oswestry disability index; COMIPre: pre-operative core outcome measures index; SFPPre: pre-operative physical component score of the short form-36; SFMPre: pre-operative mental component score of the short form-36; CCI: Charlson comorbidity index. From\_level: Upper instrumented vertebra; To\_level: lower level of instrumented vertebra. ASA: American Society of Anesthesiologists Score.
